# Supplementary material for: Integrated single cell and spatial transcriptomics reveal autoreactive differentiated B cells in joints of early rheumatoid arthritis
Source: PubMed Central journal article supplement (PMC9279471; doi:10.1038/s41598-022-15293-5), 2022-07-13
Supplement: 41598_2022_15293_MOESM1_ESM.pdf [file 41598_2022_15293_MOESM1_ESM.pdf]

Supplementary Materials for Multimodal Synovial B Cell Sequencing in Arthritis

**Full title:** Integrated Single Cell and Spatial Transcriptomics Reveal Autoreactive Differentiated B Cells in Joints of Early Rheumatoid Arthritis

**Authors:** Uta Hardt<sup>1,2,#,\*</sup>, Konstantin Carlberg, PhD<sup>3,#</sup>, Erik af Klint, MD, PhD<sup>1</sup>, Peter Sahlström<sup>1</sup>, Ludvig Larsson, PhD<sup>3</sup>, Annika van Vollenhoven<sup>1</sup>, Susana Hernandez Machado<sup>1</sup>, Lena Israelsson<sup>1</sup>, Khaled Amara, PhD<sup>1</sup>, Karine Chemin, PhD<sup>1</sup>, Marina Korotkova, MD, PhD<sup>1</sup>, Gunilla B Karlsson Hedestam, PhD<sup>2</sup>, Anca I Catrina, MD, PhD<sup>1</sup>, Sarah A Teichmann, PhD<sup>4</sup>, Patrik L Ståhl, PhD<sup>3</sup>, Vivianne Malmström, PhD<sup>1,\*</sup>

**Author affiliations:** <sup>1</sup>Division of Rheumatology, Department of Medicine Solna, Center for Molecular Medicine, Karolinska Institutet, Stockholm, Sweden and Karolinska University Hospital, Stockholm, Sweden. <sup>2</sup>Department of Microbiology, Tumor and Cell Biology, Karolinska Institutet, Stockholm, Sweden. <sup>3</sup>Department of Gene Technology, KTH Royal Institute of Technology, Science for Life Laboratory, Stockholm, Sweden. <sup>4</sup>Wellcome Sanger Institute, Wellcome Genome Campus, Hinxton, Cambridge CB10 1SA, United Kingdom. <sup>#</sup>These authors contributed equally.

**Corresponding authors:** Uta Hardt, PhD student, Departments of Medicine, Solna, and Microbiology, Tumor and Cell Biology, Karolinska Institutet, [uta.hardt@ki.se](mailto:uta.hardt@ki.se), Tel: +46 8 524 869 43, Dr. Vivianne Malmström, Professor, Department of Medicine, Solna, Center for Molecular Medicine, Karolinska Institutet, [vivianne.malmstrom@ki.se](mailto:vivianne.malmstrom@ki.se), Tel: +46 8 517 756 09

**This file includes:** Figs. S1 to S17, Tables S1 to S3

Supplementary Materials for Multimodal Synovial B Cell Sequencing in Arthritis

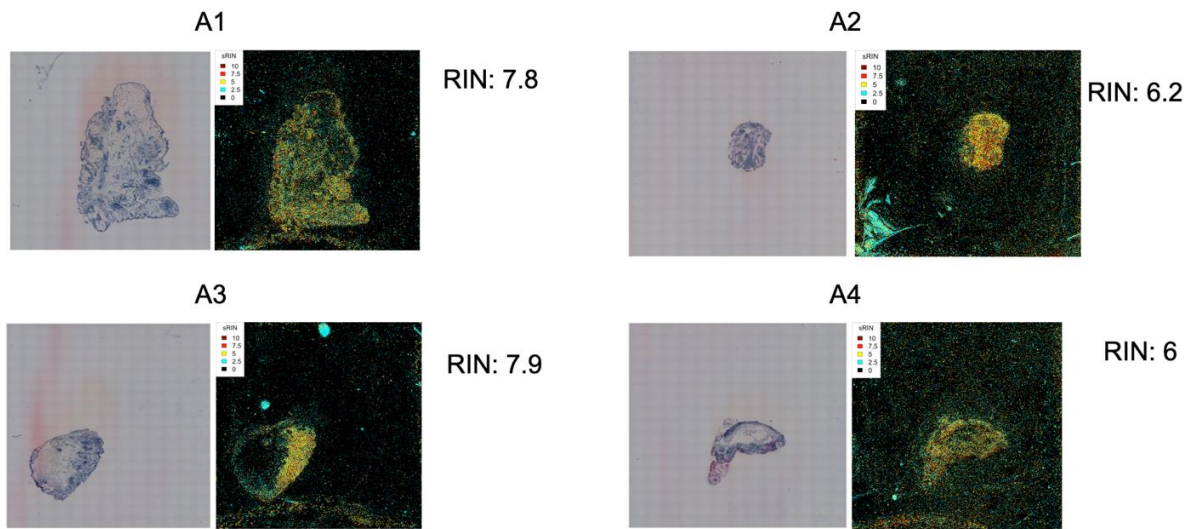

**Fig. S1.**

Spatial RIN. Heatmap over the spatial RIN scores with bulk RIN values from extracted material shown next to the heatmaps

## Supplementary Materials for Multimodal Synovial B Cell Sequencing in Arthritis

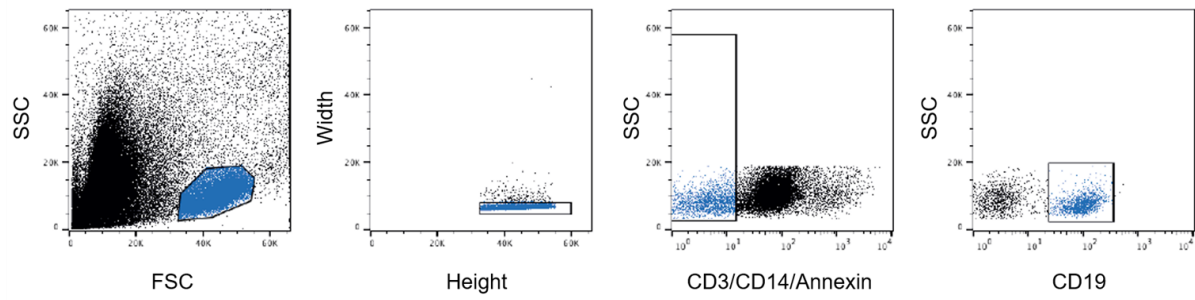

**Fig. S2.**

The gating strategy for the B cell sort is shown. We selected AnnexinV-CD3-CD14-CD19+ single lymphocytes.

Supplementary Materials for Multimodal Synovial B Cell Sequencing in Arthritis

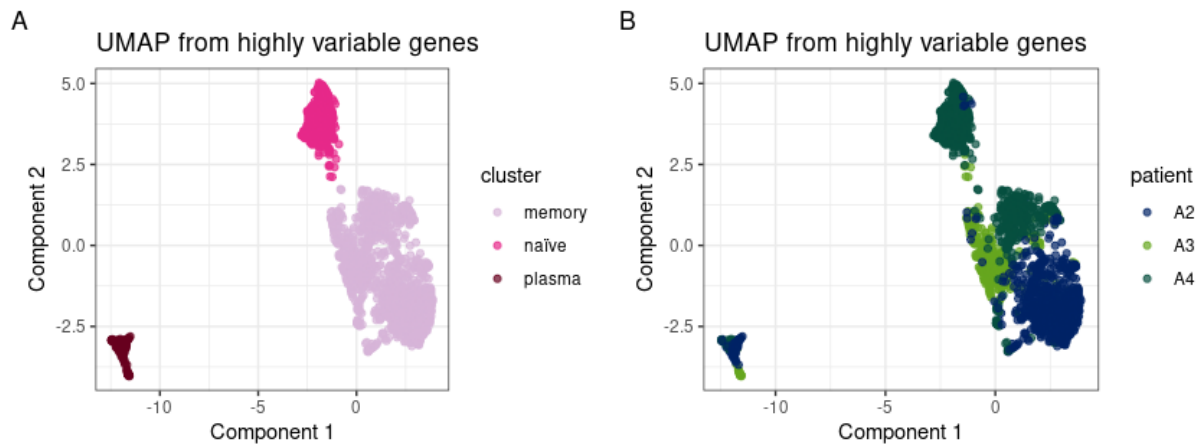

**Fig. S3.**

UMAP of scRNAseq data coloured by **(A)** cell cluster and **(B)** patient contribution.

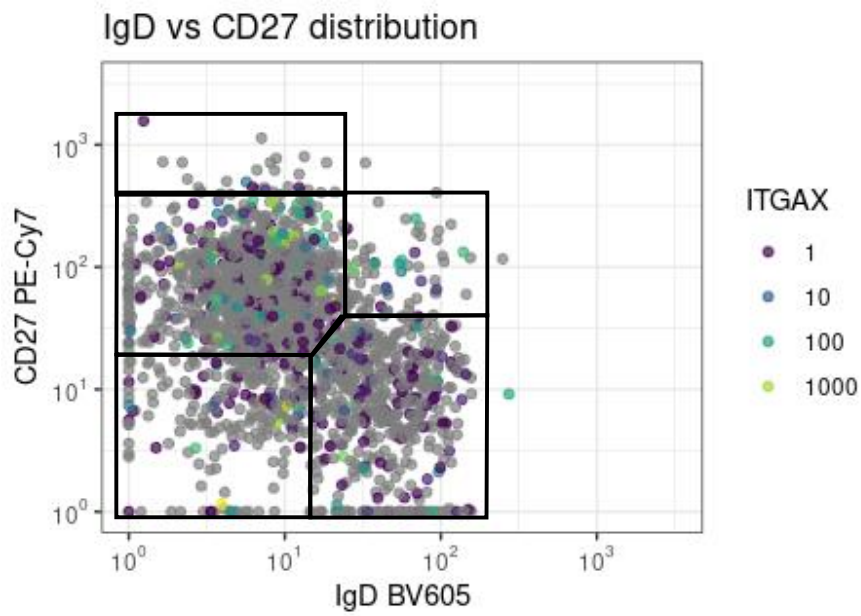

**Fig. S4.**

ITGAX (encoding CD11c) expression was projected onto the IgD vs CD27 distribution.

Supplementary Materials for Multimodal Synovial B Cell Sequencing in Arthritis

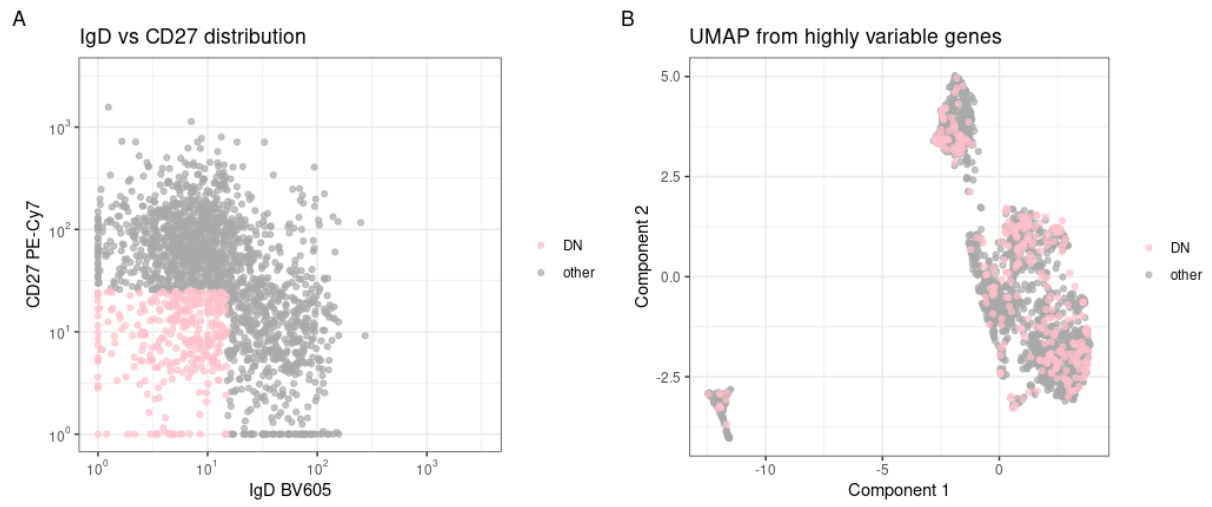

**Fig. S5.**

The double negative population in the scRNAseq data is shown.

Supplementary Materials for Multimodal Synovial B Cell Sequencing in Arthritis

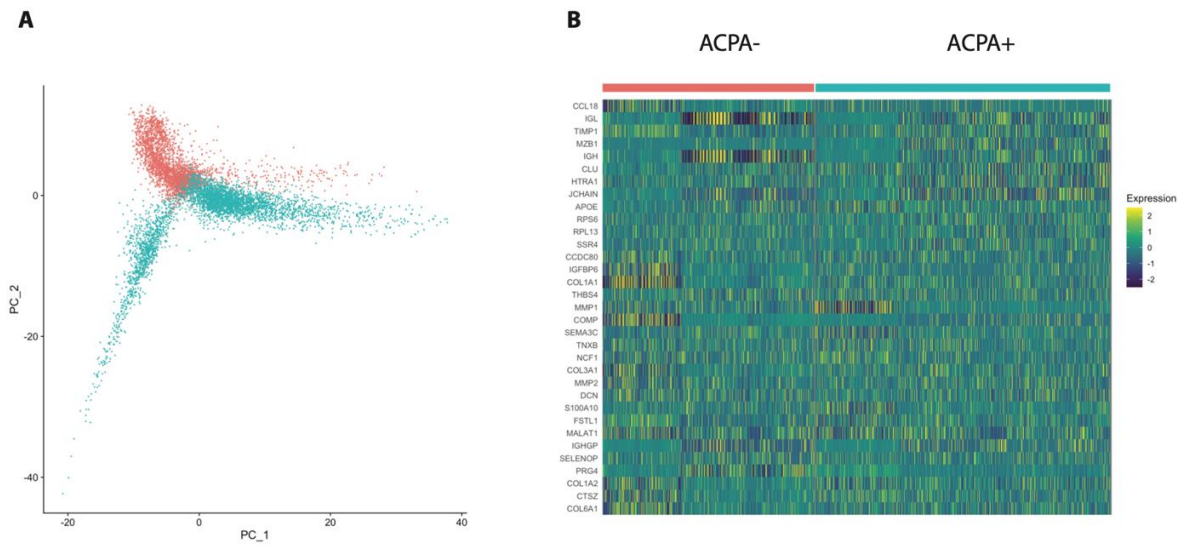

**Fig. S6.**

(A) PCA labelled by serotype (red ACPA-, turquoise ACPA+) showing overlaps and separation between data points for each group. (B) Heatmap over the marker genes for each group with little differences between ACPA+ and ACPA- RA.

# Supplementary Materials for Multimodal Synovial B Cell Sequencing in Arthritis

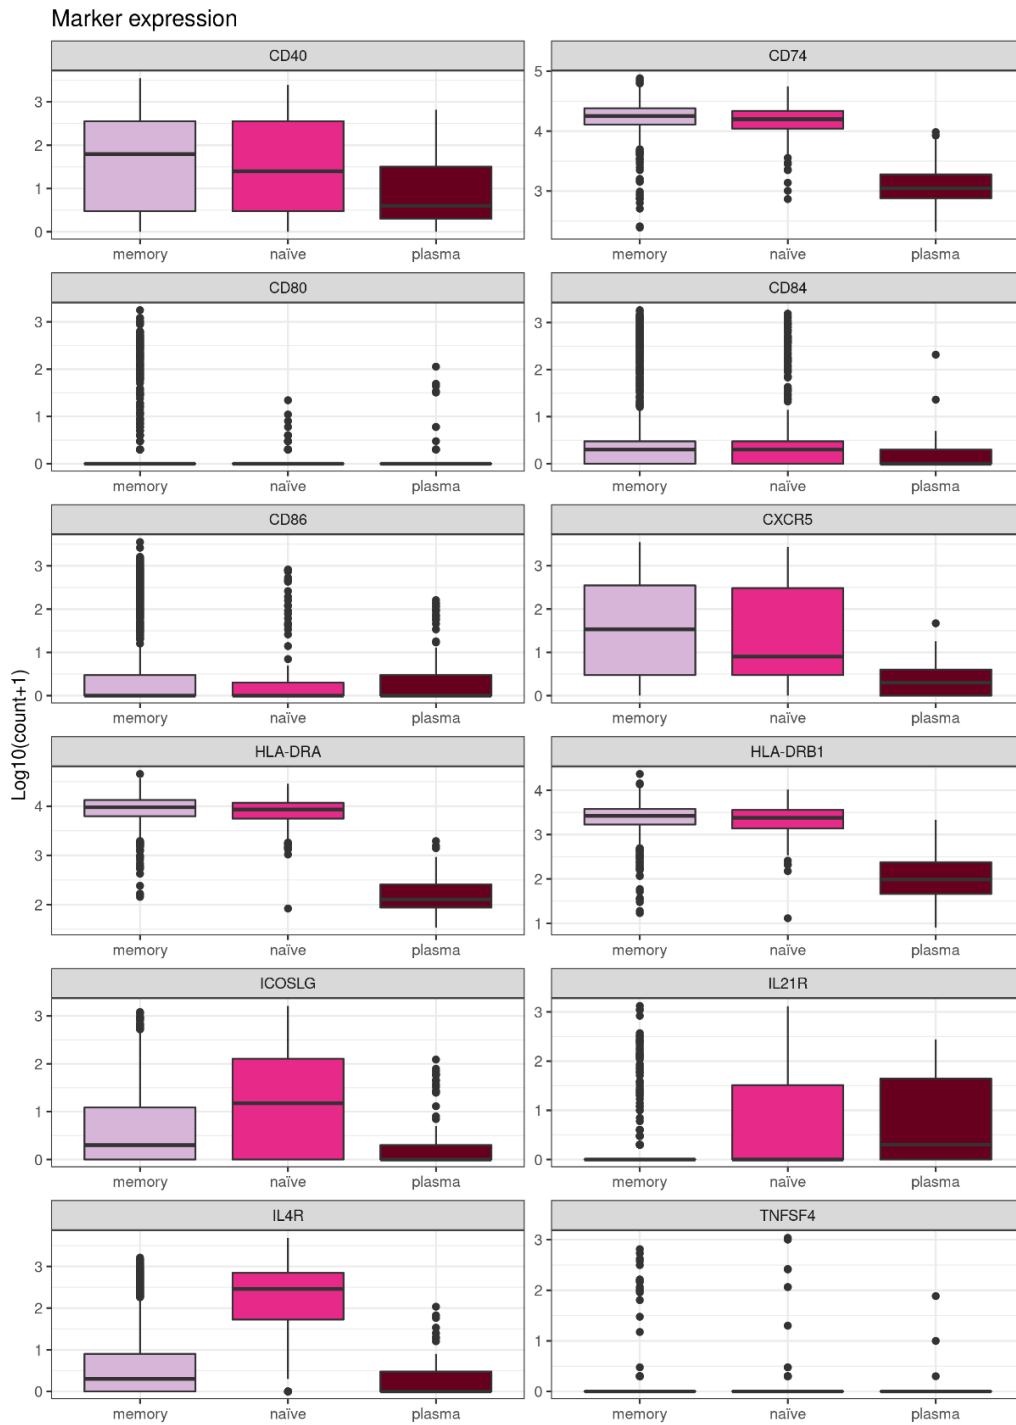

**Fig. S7.**

Logarithmic read count for B-T cell interaction markers are shown grouped by cell subset. Most markers are present in the naïve and the memory cell subset.





**Fig. S8.**

The factor analysis for spatial transcriptomics is shown. Most factors (e.g. 2,11,16,18) are represented on all tissues. Several factors have expression activities overlapping with distinct morphological areas such as infiltrates, connective tissue as well as areas bordering the infiltrates. These could be regarded as baseline tissue signals with *CD55* being of particular interest as it marks the intimal lining fibroblast-like synoviocytes. Three factors (6,8,13) shows a strong activity towards the immune cell-rich areas in biopsy A1. These areas correlate with *IGH*, *IGL*, *JCHAIN*, *MZB1*, *XPB1* and *CD79A* expression suggesting plasma cell presence. Factor 20 has strong activity within cluster 4 for biopsy A2. Here the driver genes are the plasma cell markers mentioned before as well as *HLA-DRB1* and *CD74* further highlighting antigen presentation. Biopsy A3 present factor 6 with strong activity in lymphocyte aggregates. Factor 6 is among others associated with the HLA-associated *CD74* gene. For biopsy A4, two of the factors (4,19) have genes associated with connective tissue and several HLA genes.

# Supplementary Materials for Multimodal Synovial B Cell Sequencing in Arthritis

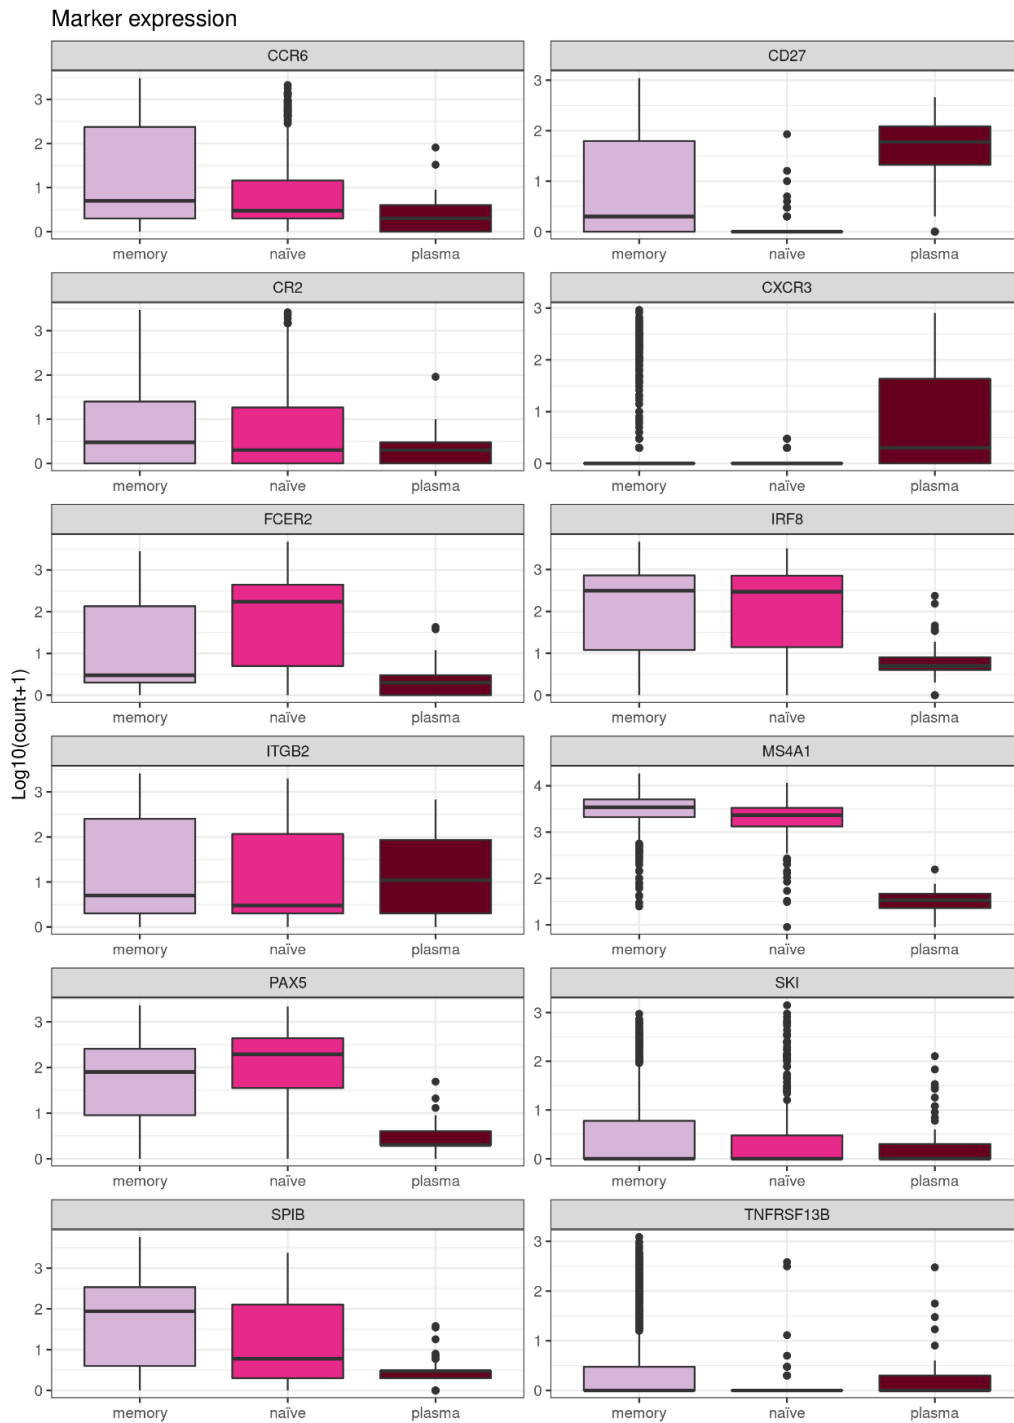

**Fig. S9.**

Logarithmic read count for memory B cell markers is shown grouped by cell subset. Most memory markers are either shared with the naïve or the plasma cell subset.

Supplementary Materials for Multimodal Synovial B Cell Sequencing in Arthritis

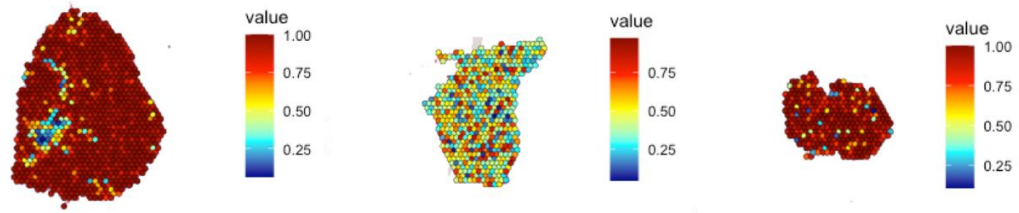

**Fig. S10.**

The memory B cell subset from paired data from the same individual was predicted on the tissue sections. The color bar represents the prediction score for memory B cells on the tissue sections.

## Supplementary Materials for Multimodal Synovial B Cell Sequencing in Arthritis

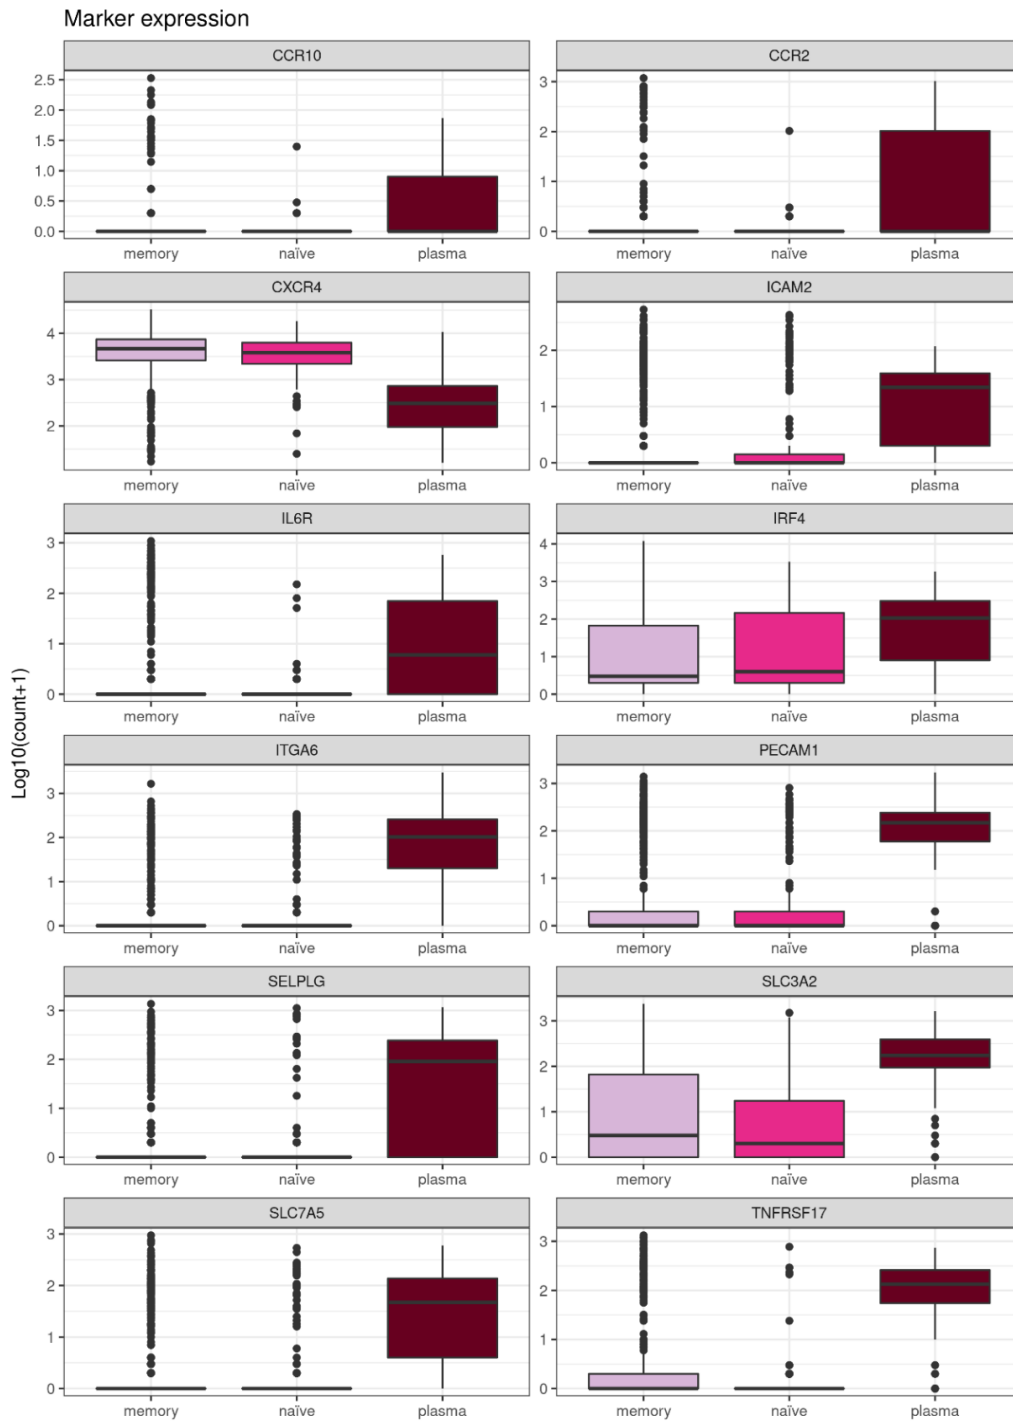

**Fig. S11.**

Logarithmic read count for plasma cell markers is shown grouped by cell subset. Most markers are clearly exclusive to plasma cells.

Supplementary Materials for Multimodal Synovial B Cell Sequencing in Arthritis

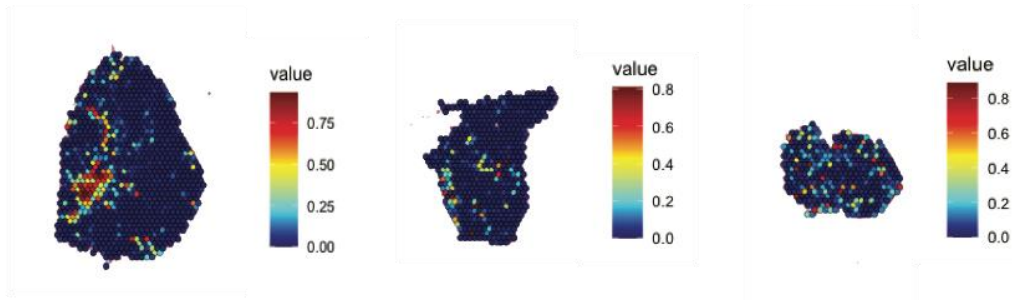

**Fig. S12.**

The plasma cell subset from paired data from one individual was predicted on the tissue sections.

The color bar represents the prediction score for plasma cells on the tissue sections. Integration showed a clear correlation with the Zhang et al. <sup>17</sup> data.

Supplementary Materials for Multimodal Synovial B Cell Sequencing in Arthritis

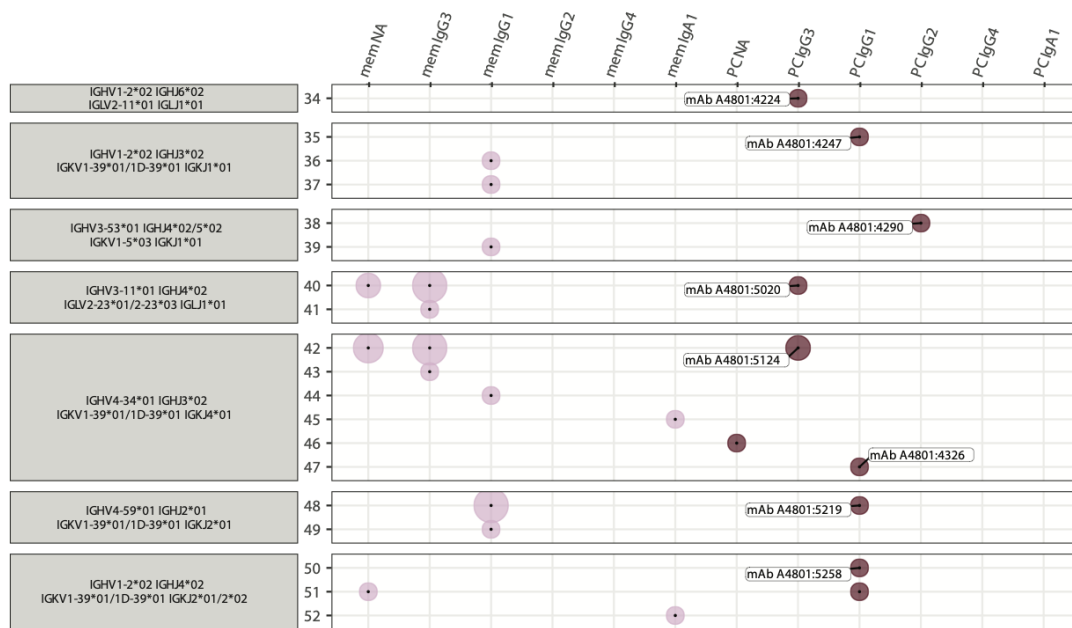

| Clone | HCDR3                | VH SHM (%)    | LCDR3        | VL SHM (%)   |
|-------|----------------------|---------------|--------------|--------------|
| 34    | AGTNYDFWSGRPWYYYGMDV | 1/294 (0.3)   | CSYAGSYTYV   | 0/295 (0.0)  |
| 35    | VRAARGSGWFHDVFDI     | 6/295 (2.0)   | QQSYSTPRT    | 3/284 (1.1)  |
| 36    | ARANFGGLRGYDAFDI     | 6/295 (2.0)   | QQSYSTRT     | 3/283 (1.1)  |
| 37    | ARANFGGLRGYDAFDI     | 8/295 (2.7)   | QQSYSTRT     | 2/283 (0.7)  |
| 38    | AKDGSSRSLVS          | 10/293 (3.4)  | QQYNSFPWT    | 11/280 (3.9) |
| 39    | AKDGSSRSLVS          | 15/293 (5.1)  | QQYNSYSPTWT  | 1/287 (0.3)  |
| 40    | ARDKRRRHVDSSGYHFDY   | 6/296 (2.0)   | CSYAGSSTSLYV | 1/295 (0.3)  |
| 41    | ARDKRRRHVDSSGYHFDY   | 6/295 (2.0)   | CSYAGSSTSLYV | 1/295 (0.3)  |
| 42    | ARARSGISAIHGVDI      | 3/293 (1.0)   | QQSYSTPPT    | 4/287 (1.4)  |
| 43    | ARARSGISAIHGVDI      | 3/285 (1.1)   | QQSYSTPPT    | 4/287 (1.4)  |
| 44    | ARARSGLGATHGAFDI     | 7/292 (2.4)   | QQSYSTPPT    | 1/287 (0.3)  |
| 45    | ARGGGYGGNSVRRAFDI    | 28/293 (9.6)  | QQTITPRA     | 21/284 (7.4) |
| 46    | ARARSGLGATHGAFDI     | 4/292 (1.4)   | QQSYSTPPT    | 4/287 (1.4)  |
| 47    | ARARSGLGATHGAFDI     | 6/292 (2.1)   | QQSFSTPPT    | 4/287 (1.4)  |
| 48    | ARGKTGYSSRNHWYFDL    | 2/292 (0.7)   | QQSSSTPMYT   | 2/284 (0.7)  |
| 49    | ARGKTGYSSRNHWYFDL    | 2/292 (0.7)   | QQSYSTPLST   | 2/284 (0.7)  |
| 50    | ARGIMGQFPPDY         | 2/293 (0.7)   | QQSYSTPQT    | 4/286 (1.4)  |
| 51    | ARGIVGQFPPDH         | 8/293 (2.7)   | QQSYSTPQT    | 2/286 (0.7)  |
| 52    | AREVGVGAILDY         | 30/296 (10.1) | QQSYSTPYT    | 15/284 (5.3) |

Fig. S13.

The plot shows the equivalent clonotype information that is shown in figure 6A for the seven plasma cell derived monoclonal antibodies originating from A3.

## Supplementary Materials for Multimodal Synovial B Cell Sequencing in Arthritis

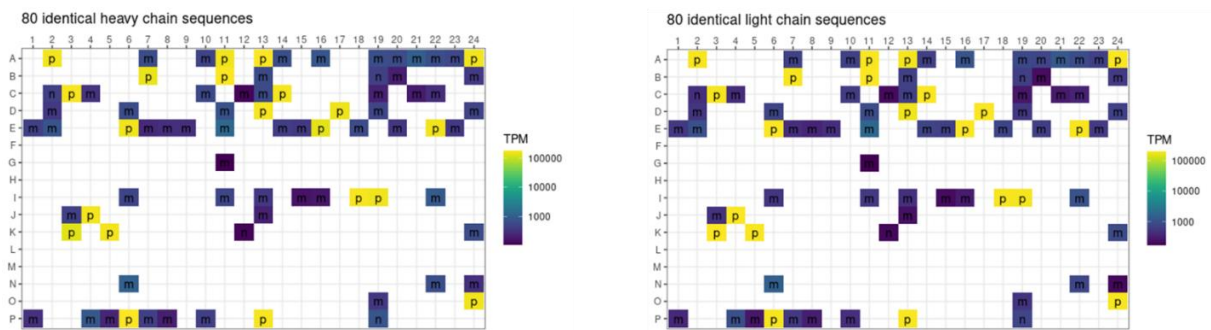

**Fig. S14.**

No index-hopping for monoclonal antibody A4797:2017. Cells expressing the A4797:2017 antibody were derived from plasma cells (p), memory B cells (m) and naïve B cells (n).



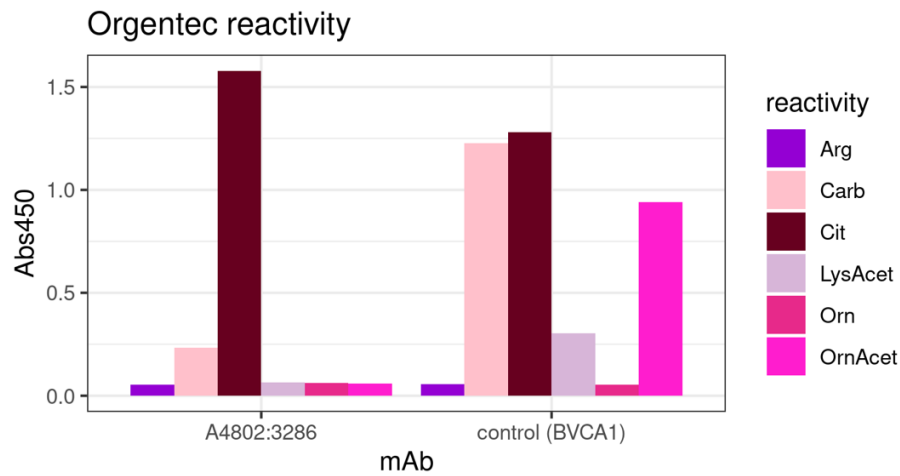

**Fig. S15.**

The Orgentec reactivity of the A4802:3286 clone compared to control (BVCA1<sup>22</sup>) is shown. The ACPA clone was found to be negative for the acetylated peptide, weakly positive for the carbamylated peptide but strongly positive for the citrullinated peptide.

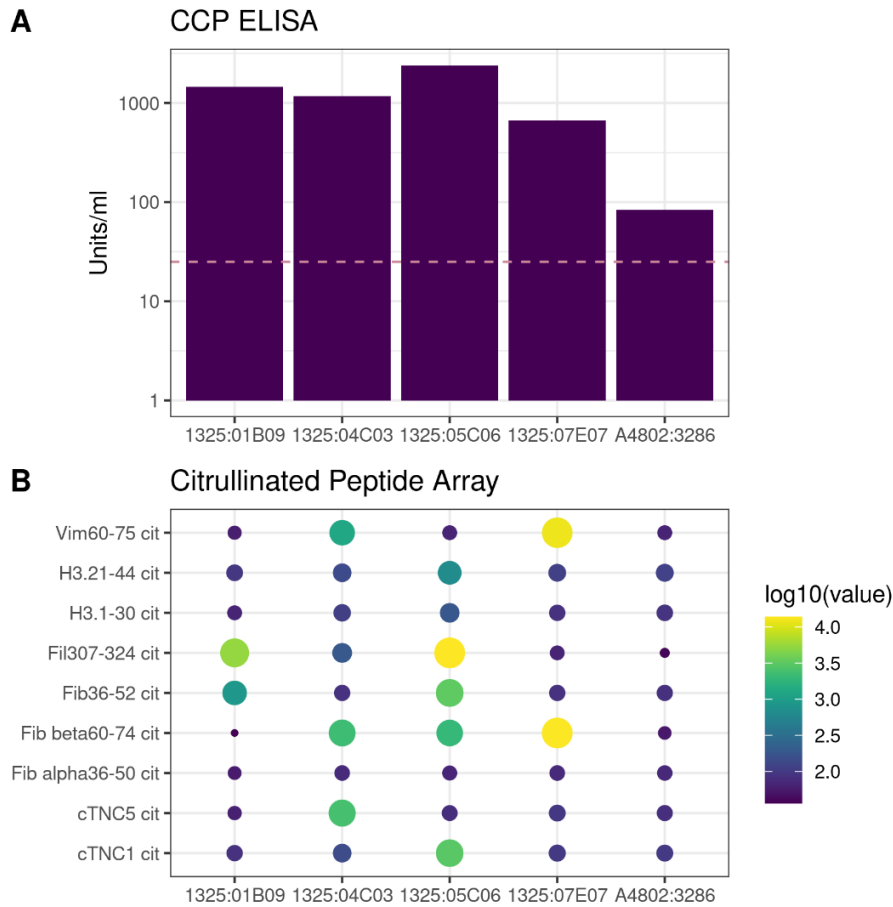

**Fig. S16.**

(A) CCP2 ELISA and (B) citrullinated peptide array<sup>20</sup> to test antigen specificity. We compared the identified A4802:3286 ACPA with previously described ACPAs generated from plasma cells from synovial fluid of RA patients with long lasting disease<sup>40</sup>. The cut-off for the anti-CCP2 ELISA was 25 units/ml. On the citrullinated peptide array, we assessed reactivity towards citrullinated Vimentin (Vim), citrullinated Histone 3 (H3), citrullinated Filaggrin (Fil), citrullinated Fibrinogen (Fib) and citrullinated Tenascin-C (TNC). Numbers indicate amino acid residues.

Supplementary Materials for Multimodal Synovial B Cell Sequencing in Arthritis

| mAb               | N-X-S/T glycosylation sites |    |             |    |
|-------------------|-----------------------------|----|-------------|----|
|                   | germline VH                 | VH | germline VL | VL |
| A4797:2017        | 0                           | 0  | 0           | 0  |
| A4797:2216        | 0                           | 0  | 0           | 0  |
| A4801:4224        | 0                           | 0  | 0           | 0  |
| A4801:4247        | 0                           | 1  | 0           | 0  |
| A4801:4290        | 0                           | 0  | 0           | 0  |
| A4801:4326        | 2                           | 2  | 0           | 0  |
| A4801:5020        | 0                           | 0  | 0           | 0  |
| A4801:5124        | 1                           | 1  | 0           | 0  |
| A4801:5219        | 0                           | 0  | 0           | 0  |
| A4801:5258        | 0                           | 0  | 0           | 0  |
| A4802:3086        | 0                           | 0  | 0           | 0  |
| A4802:3286 (ACPA) | 0                           | 0  | 0           | 2  |
| A4802:3314        | 0                           | 0  | 0           | 0  |
| A4802:6090        | 0                           | 1  | 0           | 1  |
| A4802:6117        | 0                           | 0  | 0           | 0  |

**Fig. S17.**

Germline and germline-diverted glycosylation sites in monoclonal antibodies are shown.

Supplementary Materials for Multimodal Synovial B Cell Sequencing in Arthritis

**Table S1.**

| cluster | gene          | p_val     | avg_logFC | pct_1 | pct_2 | p_val_adj |
|---------|---------------|-----------|-----------|-------|-------|-----------|
| 0       | <i>MALAT1</i> | 6.57E-69  | -12.05    | 0.55  | 0.74  | 1.20E-64  |
| 0       | <i>CD74</i>   | 1.63E-56  | -60.97    | 0.82  | 0.90  | 2.97E-52  |
| 0       | <i>EEF1A1</i> | 9.36E-55  | -21.51    | 0.74  | 0.84  | 1.70E-50  |
| 0       | <i>MMP3</i>   | 3.91E-51  | -136.45   | 0.60  | 0.75  | 7.11E-47  |
| 0       | <i>ACTB</i>   | 1.67E-49  | -19.56    | 0.80  | 0.88  | 3.05E-45  |
| 0       | <i>B2M</i>    | 3.88E-48  | -70.56    | 0.94  | 0.96  | 7.05E-44  |
| 0       | <i>TMSB4X</i> | 3.90E-48  | -14.42    | 0.69  | 0.80  | 7.10E-44  |
| 0       | <i>COL3A1</i> | 6.07E-48  | -73.30    | 0.63  | 0.77  | 1.10E-43  |
| 0       | <i>FTH1</i>   | 1.73E-47  | -23.46    | 0.67  | 0.79  | 3.15E-43  |
| 0       | <i>HLA-B</i>  | 7.41E-47  | -70.56    | 0.88  | 0.93  | 1.35E-42  |
| 1       | <i>IGF1</i>   | 1.24E-77  | 0.97      | 0.21  | 0.06  | 2.26E-73  |
| 1       | <i>COL1A1</i> | 8.88E-52  | 190.30    | 0.77  | 0.59  | 1.62E-47  |
| 1       | <i>MMP2</i>   | 1.77E-30  | 25.89     | 0.56  | 0.40  | 3.22E-26  |
| 1       | <i>COL3A1</i> | 5.12E-24  | 61.33     | 0.82  | 0.72  | 9.31E-20  |
| 1       | <i>ELN</i>    | 1.59E-22  | 7.58      | 0.23  | 0.13  | 2.90E-18  |
| 1       | <i>FNDC1</i>  | 3.89E-19  | 0.31      | 0.11  | 0.05  | 7.08E-15  |
| 1       | <i>ASPN</i>   | 4.95E-19  | 6.42      | 0.12  | 0.06  | 9.02E-15  |
| 1       | <i>AEBP1</i>  | 8.85E-19  | 21.02     | 0.36  | 0.25  | 1.61E-14  |
| 1       | <i>COMP</i>   | 3.25E-18  | 2.98      | 0.23  | 0.14  | 5.92E-14  |
| 1       | <i>CCL18</i>  | 3.77E-16  | 5.23      | 0.33  | 0.23  | 6.86E-12  |
| 2       | <i>MMP3</i>   | 2.67E-276 | 118.78    | 0.94  | 0.69  | 4.86E-272 |

Supplementary Materials for Multimodal Synovial B Cell Sequencing in Arthritis

|       |                |           |         |      |      |           |
|-------|----------------|-----------|---------|------|------|-----------|
| 2     | <i>MMP1</i>    | 1.04E-210 | 36.51   | 0.72 | 0.28 | 1.89E-206 |
| 2     | <i>FNI</i>     | 9.72E-146 | 269.70  | 0.99 | 0.98 | 1.77E-141 |
| 2     | <i>HTRA1</i>   | 9.61E-138 | -22.09  | 0.88 | 0.72 | 1.75E-133 |
| 2     | <i>PRG4</i>    | 7.54E-126 | Inf     | 0.99 | 0.97 | 1.37E-121 |
| 2     | <i>CRTAC1</i>  | 8.49E-125 | 18.19   | 0.85 | 0.67 | 1.54E-120 |
| 2     | <i>MT2A</i>    | 3.02E-110 | 25.90   | 0.85 | 0.69 | 5.49E-106 |
| 2     | <i>CLU</i>     | 5.26E-110 | -76.09  | 0.95 | 0.88 | 9.57E-106 |
| 2     | <i>VCAM1</i>   | 9.61E-102 | 1.96    | 0.76 | 0.53 | 1.75E-97  |
| 2     | <i>PLA2G2A</i> | 5.94E-97  | 8.88    | 0.81 | 0.62 | 1.08E-92  |
| <hr/> |                |           |         |      |      |           |
| 3     | <i>MALAT1</i>  | 1.21E-125 | -4.57   | 1.00 | 0.67 | 2.21E-121 |
| 3     | <i>ACTB</i>    | 8.96E-66  | -34.59  | 0.77 | 0.88 | 1.63E-61  |
| 3     | <i>EEF1A1</i>  | 6.41E-65  | -23.05  | 0.71 | 0.83 | 1.17E-60  |
| 3     | <i>HLA-B</i>   | 1.12E-58  | -108.00 | 0.87 | 0.93 | 2.03E-54  |
| 3     | <i>RPL13A</i>  | 4.02E-58  | -12.76  | 0.46 | 0.68 | 7.31E-54  |
| 3     | <i>TMSB4X</i>  | 3.17E-57  | -27.81  | 0.65 | 0.79 | 5.77E-53  |
| 3     | <i>MT-CO3</i>  | 5.39E-57  | -53.99  | 0.86 | 0.92 | 9.81E-53  |
| 3     | <i>TMSB10</i>  | 1.31E-56  | -23.63  | 0.57 | 0.74 | 2.38E-52  |
| 3     | <i>MT-ND1</i>  | 5.70E-56  | -20.54  | 0.71 | 0.84 | 1.04E-51  |
| 3     | <i>MT-ND4</i>  | 2.13E-55  | -32.26  | 0.75 | 0.86 | 3.87E-51  |
| <hr/> |                |           |         |      |      |           |
| 4     | <i>JCHAIN</i>  | 7.99E-184 | 42.19   | 0.78 | 0.35 | 1.45E-179 |
| 4     | <i>IGH</i>     | 2.73E-141 | Inf     | 0.97 | 0.84 | 4.97E-137 |
| 4     | <i>MZB1</i>    | 6.11E-97  | 2.10    | 0.49 | 0.19 | 1.11E-92  |
| 4     | <i>IGHGP</i>   | 2.00E-92  | 74.42   | 0.42 | 0.15 | 3.63E-88  |

Supplementary Materials for Multimodal Synovial B Cell Sequencing in Arthritis

|       |                 |           |       |      |      |           |
|-------|-----------------|-----------|-------|------|------|-----------|
| 4     | <i>TXNDC5</i>   | 5.11E-77  | 9.17  | 0.57 | 0.29 | 9.30E-73  |
| 4     | <i>DERL3</i>    | 4.95E-72  | 0.67  | 0.26 | 0.07 | 9.02E-68  |
| 4     | <i>CD79A</i>    | 4.75E-58  | 0.57  | 0.24 | 0.07 | 8.64E-54  |
| 4     | <i>XBPI</i>     | 4.74E-57  | 4.20  | 0.47 | 0.24 | 8.62E-53  |
| 4     | <i>PIM2</i>     | 1.03E-52  | 0.93  | 0.25 | 0.08 | 1.88E-48  |
| 4     | <i>SDCI</i>     | 1.82E-50  | 0.93  | 0.23 | 0.07 | 3.31E-46  |
| <hr/> |                 |           |       |      |      |           |
| 5     | <i>HLA-DQA1</i> | 5.13E-72  | 1.70  | 0.62 | 0.34 | 9.34E-68  |
| 5     | <i>LYZ</i>      | 3.39E-66  | 4.87  | 0.68 | 0.42 | 6.17E-62  |
| 5     | <i>CD74</i>     | 3.22E-56  | 2.16  | 0.94 | 0.88 | 5.86E-52  |
| 5     | <i>HLA-DRA</i>  | 6.95E-44  | 31.21 | 0.90 | 0.87 | 1.26E-39  |
| 5     | <i>CXCL9</i>    | 3.52E-41  | 2.41  | 0.41 | 0.21 | 6.41E-37  |
| 5     | <i>HLA-DRB1</i> | 2.76E-38  | 5.17  | 0.78 | 0.67 | 5.02E-34  |
| 5     | <i>FTH1</i>     | 3.77E-37  | 1.21  | 0.84 | 0.76 | 6.86E-33  |
| 5     | <i>FTL</i>      | 1.95E-36  | 2.99  | 0.90 | 0.86 | 3.55E-32  |
| 5     | <i>HLA-DPA1</i> | 2.04E-36  | 6.94  | 0.75 | 0.60 | 3.71E-32  |
| 5     | <i>TMSB10</i>   | 4.28E-36  | 11.04 | 0.82 | 0.71 | 7.79E-32  |
| <hr/> |                 |           |       |      |      |           |
| 6     | <i>IGFBP7</i>   | 1.01E-164 | 2.96  | 0.82 | 0.40 | 1.84E-160 |
| 6     | <i>ACTA2</i>    | 1.87E-148 | 4.21  | 0.48 | 0.12 | 3.40E-144 |
| 6     | <i>TAGLN</i>    | 1.90E-112 | 1.93  | 0.42 | 0.12 | 3.46E-108 |
| 6     | <i>MCAM</i>     | 7.17E-101 | 0.81  | 0.33 | 0.08 | 1.30E-96  |
| 6     | <i>VWF</i>      | 1.60E-86  | 2.41  | 0.35 | 0.10 | 2.91E-82  |
| 6     | <i>MYL9</i>     | 1.06E-73  | 2.30  | 0.64 | 0.34 | 1.92E-69  |
| 6     | <i>NR2F2</i>    | 5.89E-58  | 0.61  | 0.20 | 0.05 | 1.07E-53  |

Supplementary Materials for Multimodal Synovial B Cell Sequencing in Arthritis

|       |                 |          |         |      |      |          |
|-------|-----------------|----------|---------|------|------|----------|
| 6     | <i>ACKR1</i>    | 4.38E-49 | 0.64    | 0.19 | 0.05 | 7.97E-45 |
| 6     | <i>CCL19</i>    | 4.31E-48 | 17.11   | 0.29 | 0.11 | 7.85E-44 |
| 6     | <i>NOTCH3</i>   | 1.16E-40 | 0.71    | 0.30 | 0.12 | 2.12E-36 |
| <hr/> |                 |          |         |      |      |          |
| 7     | <i>PRELP</i>    | 9.81E-63 | 5.75    | 0.56 | 0.17 | 1.78E-58 |
| 7     | <i>HTRA1</i>    | 2.30E-53 | 27.27   | 0.96 | 0.73 | 4.18E-49 |
| 7     | <i>PRG4</i>     | 3.43E-26 | -Inf    | 0.99 | 0.97 | 6.24E-22 |
| 7     | <i>CSN1S1</i>   | 2.43E-22 | 5.88    | 0.25 | 0.08 | 4.43E-18 |
| 7     | <i>FNI</i>      | 2.58E-22 | -264.68 | 0.99 | 0.98 | 4.70E-18 |
| 7     | <i>AMTN</i>     | 2.65E-22 | 10.23   | 0.21 | 0.06 | 4.82E-18 |
| 7     | <i>CRTAC1</i>   | 1.36E-21 | -13.01  | 0.80 | 0.69 | 2.48E-17 |
| 7     | <i>CLU</i>      | 8.46E-20 | 81.27   | 0.90 | 0.89 | 1.54E-15 |
| 7     | <i>IGFBP5</i>   | 1.34E-19 | -2.67   | 0.67 | 0.46 | 2.44E-15 |
| 7     | <i>SLC39A14</i> | 1.70E-19 | -0.47   | 0.47 | 0.24 | 3.10E-15 |
| <hr/> |                 |          |         |      |      |          |
| 8     | <i>FABP4</i>    | 1.51E-47 | 5.49    | 0.26 | 0.05 | 2.75E-43 |
| 8     | <i>PLIN4</i>    | 1.03E-41 | 0.42    | 0.19 | 0.03 | 1.88E-37 |
| 8     | <i>LPL</i>      | 2.04E-37 | 0.79    | 0.15 | 0.02 | 3.71E-33 |
| 8     | <i>C3</i>       | 1.15E-33 | -0.51   | 0.59 | 0.27 | 2.09E-29 |
| 8     | <i>SCD</i>      | 1.48E-23 | 0.74    | 0.26 | 0.08 | 2.70E-19 |
| 8     | <i>SAA1</i>     | 6.65E-19 | 0.86    | 0.18 | 0.05 | 1.21E-14 |
| 8     | <i>B2M</i>      | 4.73E-12 | -155.66 | 0.96 | 0.96 | 8.60E-08 |
| 8     | <i>HLA-A</i>    | 8.23E-11 | -65.66  | 0.69 | 0.80 | 1.50E-06 |
| 8     | <i>HLA-B</i>    | 1.13E-10 | -119.66 | 0.91 | 0.92 | 2.05E-06 |
| 8     | <i>HLA-E</i>    | 6.72E-10 | -4.90   | 0.56 | 0.68 | 1.22E-05 |

Supplementary Materials for Multimodal Synovial B Cell Sequencing in Arthritis

|   |              |          |         |      |      |          |
|---|--------------|----------|---------|------|------|----------|
| 9 | <i>HBA2</i>  | 0.00E+00 | 2.00    | 1.00 | 0.05 | 0.00E+00 |
| 9 | <i>HBA1</i>  | 7.79E-33 | 1.84    | 0.14 | 0.02 | 1.42E-28 |
| 9 | <i>MMP2</i>  | 1.82E-08 | -26.12  | 0.24 | 0.43 | 3.32E-04 |
| 9 | <i>CLU</i>   | 3.92E-08 | -149.47 | 0.78 | 0.89 | 7.14E-04 |
| 9 | <i>CD68</i>  | 8.59E-08 | -4.06   | 0.19 | 0.36 | 1.56E-03 |
| 9 | <i>ENO1</i>  | 1.02E-07 | -4.21   | 0.26 | 0.44 | 1.86E-03 |
| 9 | <i>PSAP</i>  | 1.39E-07 | -24.50  | 0.72 | 0.81 | 2.53E-03 |
| 9 | <i>SATI</i>  | 1.73E-07 | -4.67   | 0.29 | 0.46 | 3.16E-03 |
| 9 | <i>CTSB</i>  | 2.22E-07 | -19.17  | 0.67 | 0.77 | 4.04E-03 |
| 9 | <i>HTRA1</i> | 2.70E-07 | -96.38  | 0.66 | 0.74 | 4.91E-03 |

Top 10 differentially expressed genes for 10 spatial transcriptomics clusters are shown.



Supplementary Materials for Multimodal Synovial B Cell Sequencing in Arthritis

**Table S2.**

|                        | OR   | p-value  |
|------------------------|------|----------|
| Naïve B cells (SC-B1)  | 20.3 | <2.2e-16 |
| Memory B cells (SC-B2) | 99.6 | <2.2e-16 |
| Plasma cells (SC-B4)   | 3.27 | <2.2e-16 |

Fisher's exact test for memory B cells and the naïve B cells, memory B cells and plasma cells clusters from previously published studies <sup>17</sup> is shown.

Supplementary Materials for Multimodal Synovial B Cell Sequencing in Arthritis

**Table S3.**

|                        | OR    | p-value  |
|------------------------|-------|----------|
| Naïve B cells (SC-B1)  | 0.438 | 1        |
| Memory B cells (SC-B2) | 0     | 1        |
| Plasma cells (SC-B4)   | 45.1  | <2.2e-16 |

Fisher's exact test for plasma cells and the naïve B cells, memory B cells and plasma cell clusters from previously published studies <sup>17</sup> is shown.
